# Supplementary material
Source: publisher site journal article supplement (https://www.dovepress.com/article/587574)
Supplement: Supplementary file 1 [file 587574%20Supplementary%20Material.docx]

**Supplementary Material**

**Table S1.** Patient Demographic and Clinical Characteristics at Time of Biologic Referral Overall and According to Race.

|  | Overall  N=215 | White  N=148 | Black or African American  N=59 | Othera  N=8 |
| --- | --- | --- | --- | --- |
| **Age at referral** (median, IQR) | 48 (26, 60) | 53 (37, 62) | 33 (16, 52) | 41 (21, 47) |
| **Gender, n(%)** | | | | |
| Female | 118 (54.9%) | 78 (52.7%) | 33 (55.9%) | 7 (87.5%) |
| Male | 97 (45.1%) | 70 (47.3%) | 26 (44.1%) | 1 (12.5%) |
| **Ethnicity, n(%)** | | | | |
| None of these | 70 (32.6%) | 43 (29.1%) | 25 (42.4%) | 2 (25.0% |
| Not Hispanic or Latino | 67 (31.2%) | 48 (32.4%) | 17 (28.8%) | 2 (25.0%) |
| Unknown | 59 (27.4%) | 44 (29.7%) | 14 (23.7%) | 1 (12.5%) |
| Other | 19 (8.8%) | 13 (8.8%) | 3 (5.1%) | 3 (37.5%) |
| **Asthma severity, n(%)** | | | | |
| Moderate-persistent asthma | 113 (52.6%) | 80 (54.1%) | 27 (45.8%) | 6 (75.0%) |
| Severe-persistent asthma | 102 (47.4%) | 68 (45.9%) | 32 (54.2%) | 2 (25.0%) |
| **Insurance Type** | | | | |
| Commercial | 115 (53.5%) | 83 (56.1%) | 27 (45.8%) | 5 (62.5%) |
| Medicare | 48 (22.3%) | 40 (27.0%) | 8 (13.6%) | - |
| Medicaid | 35 (16.3%) | 14 (9.5%) | 19 (32.2%) | 2 (25.0%) |
| Tricare/Other/None | 17 (7.9%) | 11 (7.4%) | 5 (8.5%) | 1 (12.5%) |
| **Smoking Status** | | | | |
| Never smoker/Never exposure or Unknown | 129 (60.0%) | 86 (58.1%) | 36 (61.0%) | 7 (87.5%) |
| Exposure | 21 (9.8%) | 11 (7.43%) | 9 (15.3%) | 1 (12.5%) |
| Previous | 43 (20.0%) | 36 (24.3%) | 7 (11.9%) | - |
| Current | 22 (10.2%) | 15 (10.1%) | 7 (11.9%) | - |
| **Deprivation Index,** Median (IQR) | 0.37 (0.27, 0.44) | 0.37 (0.25, 0.43) | 0.38 (0.31, 0.50) | 0.35 (0.23, 0.36) |
| **Distance to Care (miles),** Median (IQR) | 2.0 (1.0, 5.2) | 2.7 (1.5, 4.5) | 2.0 (1.3, 3.1) | 2.1 (0.9, 5.9) |
| **Air Quality** **Index (AQI)**, Median (IQR), N=159 | | | | |
| Maximum AQI | 108.0 (84.0, 116.0) | 108.0 (83.0, 116.0) | 116.0 (97.0, 116.0) | 151.0 5(144.5, 151.0) |
| Nitrogen Dioxide (NO2) | 0.0 (0.0, 6.0) | 0.0 (0.0 - 5.5) | 5.5 (0.0- 6.0) | 6.0 (3.0 - 6.0) |
| Ozone | 34.7 (26.9, 100.0) | 44.5 (33.2 - 100.0) | 33.2 (20.1 - 34.7) | 33.2 (33.2 - 33.2) |
| Particulate Matter (PM2.5)b | 59.8 (0.0, 100.0) | 51.2 (0.0 - 60.8) | 60.8 (59.8 - 74.7) | 60.8 (60.8 - 60.8) |

a American Indian or Alaska Native, Native Hawaiian or Other Pacific Islander, Guamanian or Chamorro, Middle Eastern, Other, Decline to Answer, Unknown, Null, or None of These

bThe percent of days for which this pollutant was the primary pollutant

**Table S2**. Multiple Linear Regression Summary for ppFEV1 at Follow-Up

|  | Estimate (95% Confidence Interval) | p-value |
| --- | --- | --- |
| ppFEV1 at Baseline | 0.6 (0.4, 0.8) | <0.001 |
| Black or African American + Other | 0.6 (-8.3, 9.45) | 0.893 |
| Smoking (Reference: Never smoker/Never exposure or Unknown) | | |
| Exposure | -4.8 (-18.0, 8.3) | 0.463 |
| Previous | -11.6 (-23.6, 0.4) | 0.057 |
| Current | -11.2 (-27.9, 5.5) | 0.185 |
| Insurance Type (Reference: Commercial) | | |
| Medicaid | 1.2 (-9.8, 12.1) | 0.829 |
| Medicare | -6.3 (-19.2, 6.6) | 0.331 |
| Tricare/Other/None | -4.1 (-21.2, 13.0) | 0.634 |
| Deprivation Index (per 0.1 increase) | 2.1 (-1.3,5.5) | 0.230 |

**Table S3.** Change in ppFEV1 from Baseline to Follow-up

|  | White (N=38) | Black/Other (N=27) | Overall (N=65) | p-value |
| --- | --- | --- | --- | --- |
| Change in ppFEV1 PP from baseline to follow-up,  Median (IQR) | 2 (-2,10) | 4 (-6, 24) | 3 (-2, 16) | 0.558 |

**Figure S1.** One-year PDC by Race


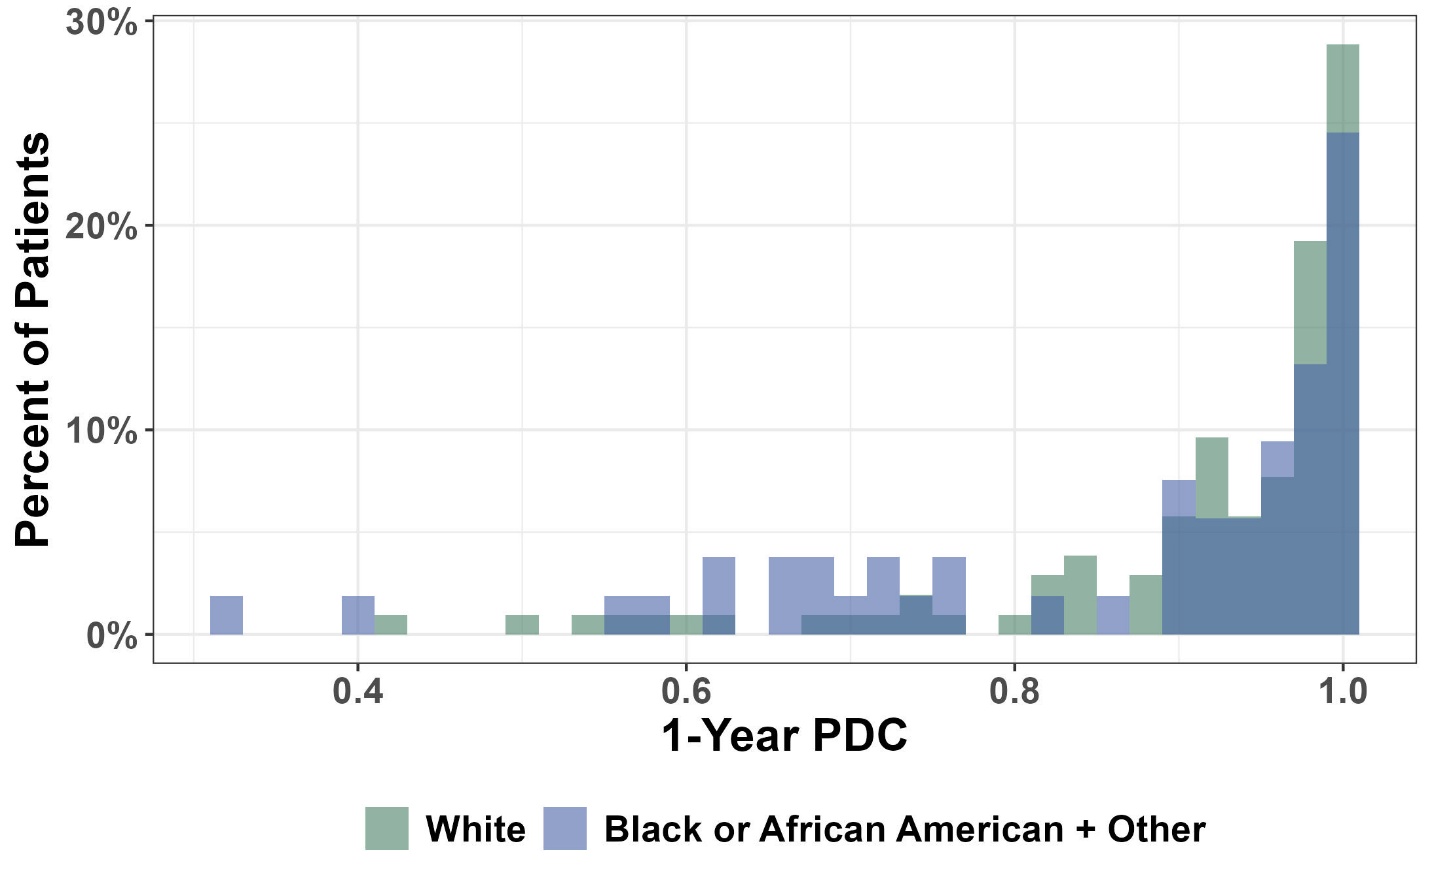


**Figure S2.** Percent Gap Days by Race


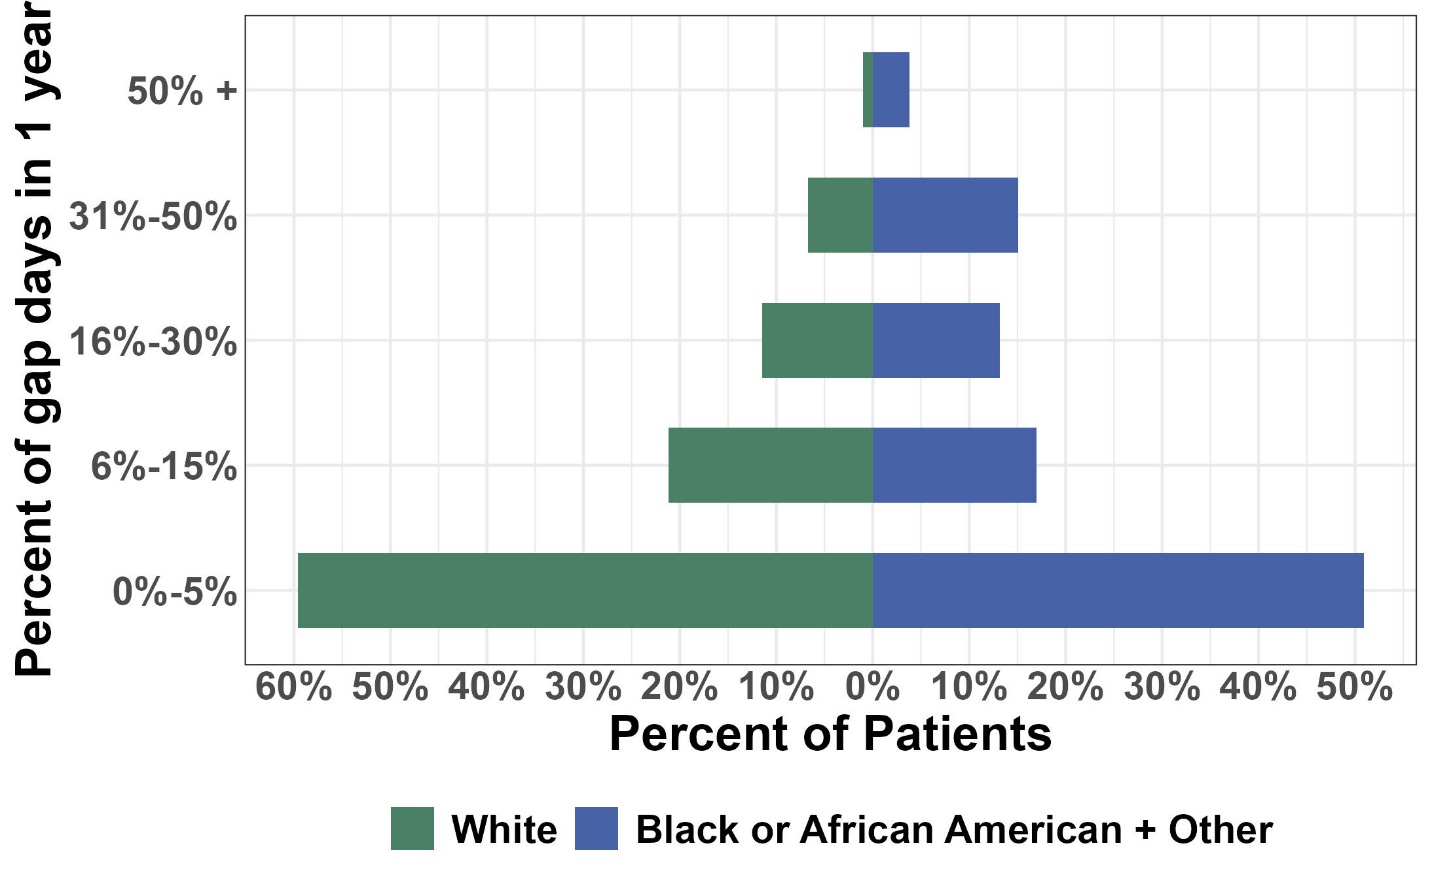


**Table S4.** Differences in Patient Demographic and Clinical Characteristics for Patients Included in the Baseline Model

|  | In analytics dataset for baseline model  N=161 | Not in analytic dataset for baseline model  N=54 | p-valuea |
| --- | --- | --- | --- |
| **Age at referral** (median, IQR) | 48 (23, 59) | 49 (29, 62) | p=0.4 |
| **Gender, n(%)** | | | |
| Female | 92 (57.1%) | 26 (48.1) | p=0.3 |
| Male | 69 (42.9%) | 28 (51.9%) |
| **Race, n(%)** | | | |
| White | 110 (68.3%) | 38 (70.4%) | p=0.8 |
| Black or African American/Other | 51 (31.7%) | 16 (29.6%) |
| **Ethnicity, n(%)** | | | |
| Unknown | 55 (34.2%) | 17 (31.5%) | p=0.8 |
| Not Hispanic or Latino | 102 (63.4%) | 35 (64.8%) |
| Hispanic or Latino | 4 (2.5%) | 2 (3.7%) |
| **Asthma severity, n(%)** | | | |
| Moderate-persistent asthma | 79 (49.1%) | 34 (63%) | p=0.077 |
| Severe-persistent asthma | 82 (50.9%) | 20 (37%) |
| **Insurance Type** | | | |
| Commercial | 86 (53.4%) | 33 (61.1%) | p=0.9 |
| Medicare | 39 (24.2%) | 11 (20.4%) |
| Medicaid | 27 (16.8%) | 8 (14.8%) |
| Tricare/Other/None | 9 (5.6%) | 2 (3.7%) |
| **Smoking Status** | | | |
| Never smoker/Never exposure or Unknown | 93 (57.8%) | 36 (66.7%) | p=0.4 |
| Exposure | 17 (10.6%) | 4 (7.4%) |
| Previous | 36 (22.4%) | 7 (13%) |
| Current | 15 (9.3%) | 7 (13%) |
| **Distance to Care (miles),** Median (IQR) | 2.0 (0.9, 4.9) | 2.6 (1.5, 5.5) | p=0.2 |

aContinuous measures were evaluated with Wilcoxon rank sum tests; categorical variables were evaluated with Pearson's Chi-squared tests or Fisher's exact tests

**Table S5.** Differences in Patient Demographic and Clinical Characteristics for Patients Included in the Follow-up Model

|  | In analytics dataset for baseline model  N=65 | Not in analytic dataset for baseline model  N=150 | p-value |
| --- | --- | --- | --- |
| **Age at referral** (median, IQR) | 39 (16, 55) | 51 (33, 62) | p<0.001 |
| **Gender, n(%)** | | | |
| Female | 33 (50.8%) | 85 (56.7%) | p=0.4 |
| Male | 32 (49.2%) | 65 (43.3%) |
| **Race, n(%)** | | | |
| White | 38 (58.5%) | 110 (73.3%) | p=0.031 |
| Black or African American/Other | 27 (41.5%) | 40 (26.7%) |
| **Ethnicity, n(%)** | | | |
| Unknown | 24 (58.5%) | 99 (66%) | p=0.4 |
| Not Hispanic or Latino | 24 (36.9%) | 48 (32%) |
| Hispanic or Latino | 3 (4.6%) | 3 (2%) |
| **Asthma severity, n(%)** | | | |
| Moderate-persistent asthma | 28 (43.1%) | 85 (56.7%) | p=0.067 |
| Severe-persistent asthma | 37 (56.9%) | 65 (43.3%) |
| **Insurance Type** | | | |
| Commercial | 36 (55.4%) | 83 (55.3%) | p=0.14 |
| Medicare | 10 (15.4%) | 40 (26.7%) |
| Medicaid | 15 (23.1%) | 20 (13.3%) |
| Tricare/Other/None | 4 (6.2%) | 7 (4.7%) |
| **Smoking Status** | | | |
| Never smoker/Never exposure or Unknown | 37 (56.9%) | 92 (61.3%) | p=0.6 |
| Exposure | 9 (13.8%) | 12 (8%) |
| Previous | 13 (20%) | 30 (20%) |
| Current | 6 (9.2%) | 16 (10.7%) |
| **Distance to Care (miles),** Median (IQR) | 2.2 (1.0, 6.5) | 2.0 (0.9, 4.9) | p=0.5 |
